# Supplementary material for: Mild Oxidative Stress Induced by Sodium Arsenite Reduces Lipocalin-2 Expression Levels in Cortical Glial Cells
Source: MDPI journal article supplement (doi:10.3390/ijms242115864), 2023-11-01
Supplement: s1 [file s1]

## **Supplemental Figures**

# **Mild Oxidative Stress Induced by Sodium Arsenite Reduces Lipocalin-2 Expression Levels in Cortical Glial Cells**

**Ye-Jin Cho, So-Hyun Park and Kwon-Yul Ryu \***

Department of Life Science, University of Seoul, Seoul 02504, Republic of Korea;  
fifi1022@naver.com (Y.-J.C.); sohyun1231@naver.com (S.-H.P.)

\* Correspondence: kyryu@uos.ac.kr

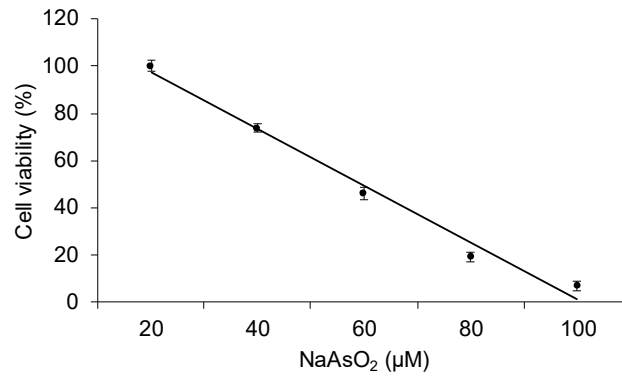

**Figure S1.** Determination of LC50 of sodium arsenite (NaAsO<sub>2</sub>) in astroglial-enriched cells. Astroglial-enriched cells were treated with NaAsO<sub>2</sub> at the indicated concentrations up to 100 μM for 1 d. The viability of cells was measured using the MTT assay (n=3). Cell viability was expressed as a percentage relative to the control in which no reduced viability was observed (20 μM NaAsO<sub>2</sub>).

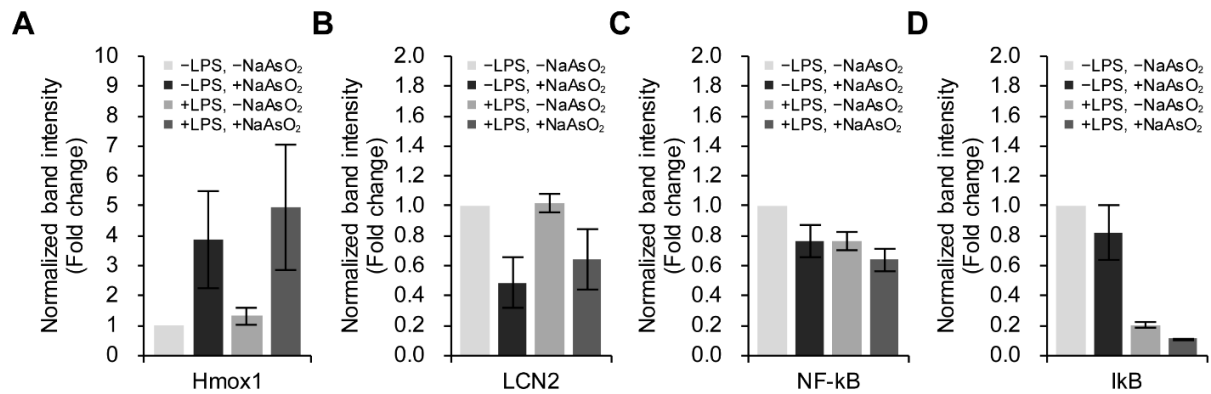

**Figure S2.** Quantification of immunoblot bands. (A,B) Band intensities of Hmox1 and LCN2 in Figure 2B were normalized to the loading control  $\beta$ -actin and expressed as the fold change relative to the control (-LPS, -NaAsO<sub>2</sub>; n=3). (C,D) Band intensities of NF- $\kappa$ B and I $\kappa$ B in Figure 2C were normalized to the loading control  $\beta$ -actin and expressed as the fold change relative to the control (-LPS, -NaAsO<sub>2</sub>; n=3). All bands intensities were quantified using ImageJ software (version 1.8.0).

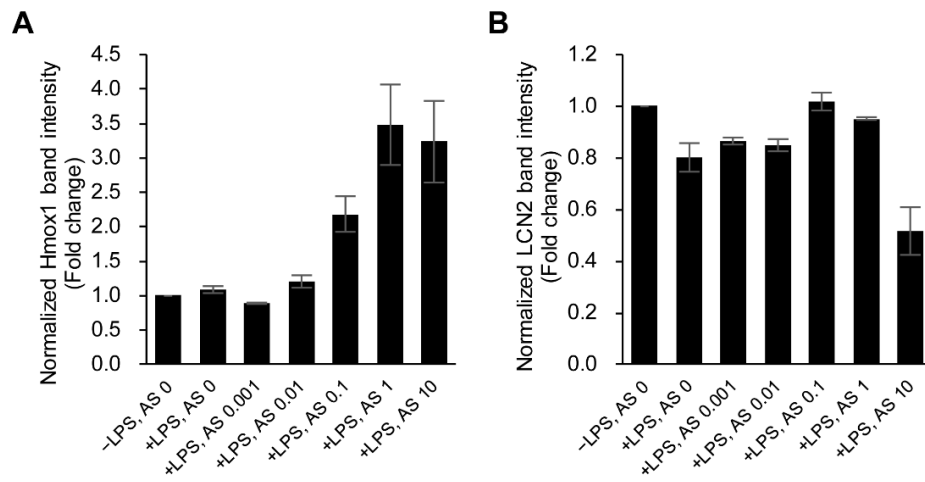

**Figure S3.** Quantification of immunoblot bands. (**A,B**) Band intensities of Hmox1 and LCN2 in Figure 3B were normalized to the loading control  $\beta$ -actin and expressed as the fold change relative to the control ( $-LPS, -NaAsO_2$ ;  $n=2$ ). All bands intensities were quantified using ImageJ software (version 1.8.0). The numbers (0, 1, 10, 50, and etc) indicate the concentration ( $\mu M$ ) of chemicals. AS,  $NaAsO_2$ .

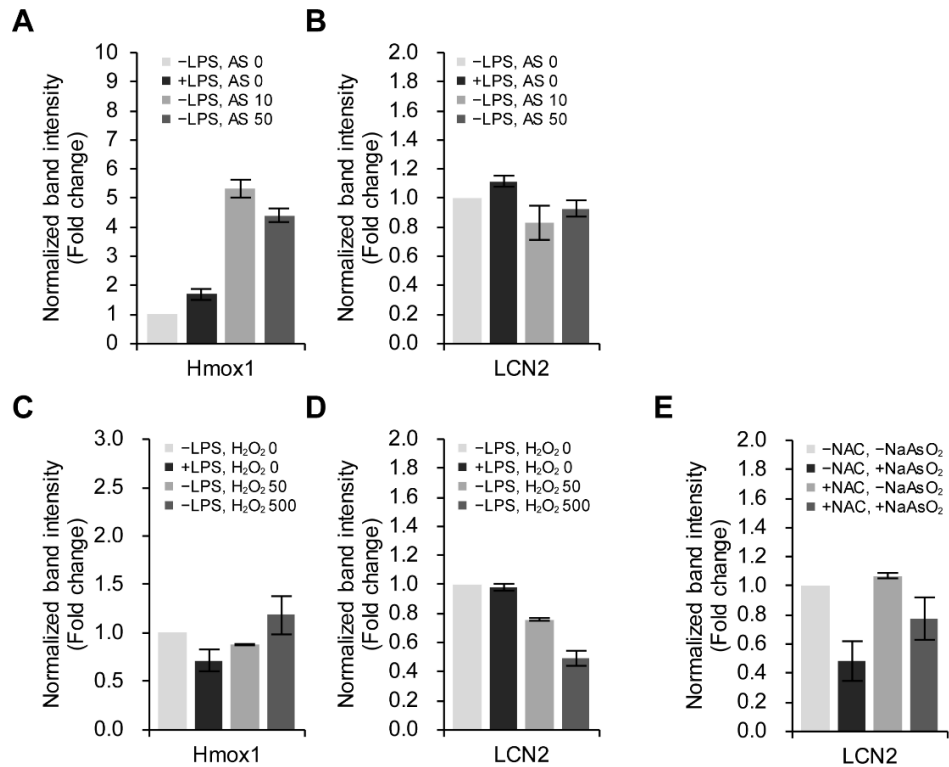

**Figure S4.** Quantification of immunoblot bands. **(A,B)** Band intensities of Hmox1 and LCN2 in Figure 3C were normalized to the loading control  $\beta$ -actin and expressed as the fold change relative to the control ( $-LPS$ ,  $-NaAsO_2$ ;  $n=2$ ). **(C,D)** Band intensities of Hmox1 and LCN2 in Figure 3D were normalized to the loading control  $\beta$ -actin and expressed as the fold change relative to the control ( $-LPS$ ,  $-H_2O_2$ ;  $n=2$ ). **(E)** Band intensities of LCN2 in Figure 3E were normalized to the loading control  $\beta$ -actin and expressed as the fold change relative to the control ( $-NAC$ ,  $-NaAsO_2$ ;  $n=2$ ). All bands intensities were quantified using ImageJ software (version 1.8.0). The numbers (0, 1, 10, 50, and etc) indicate the concentration ( $\mu M$ ) of chemicals. AS,  $NaAsO_2$ , NAC, N-acetyl-L-cysteine.

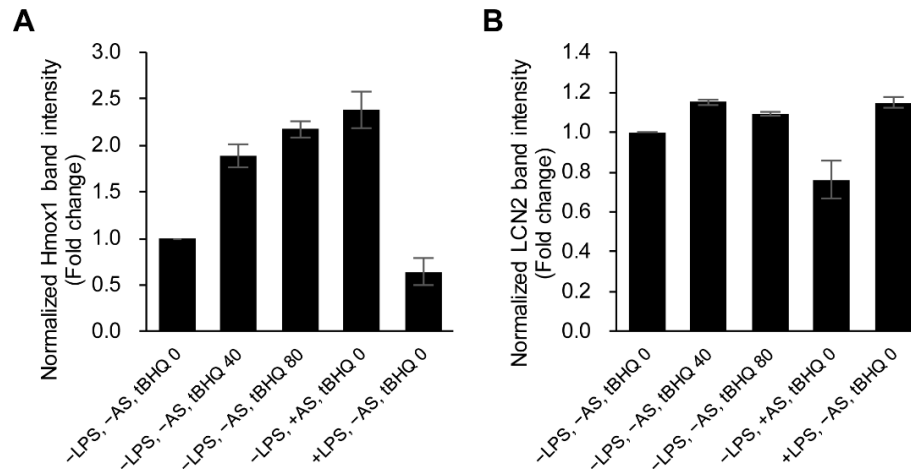

**Figure S5.** Quantification of immunoblot bands. **(A,B)** Band intensities of Hmox1 and LCN2 in Figure 4A were normalized to the loading control  $\beta$ -actin and expressed as the fold change relative to the control (-LPS, -NaAsO<sub>2</sub>, -tBHQ; n=2). All bands intensities were quantified using ImageJ software (version 1.8.0). The numbers (0, 40, and 80) indicate the concentration ( $\mu$ M) of tBHQ. AS, NaAsO<sub>2</sub>.
